# Supplementary material for: Chromosome-Level Genome Assembly and Annotation of a Periodical Cicada Species: Magicicada septendecula
Source: PubMed Central journal article supplement (PMC10799293; doi:10.1093/gbe/evae001), 2024-01-08
Supplement: evae001_supplementary_data.pdf [file evae001_supplementary_data.pdf]

**TABLE S1: Chromosome Breakdown**

| <b>Chromosome</b> | <b>Length (bp)</b> |
|-------------------|--------------------|
| 1                 | 1,456,256,088      |
| 2                 | 926,935,479        |
| 3                 | 615,102,008        |
| 4                 | 525,418,745        |
| 5                 | 500,509,132        |
| 6                 | 493,883,959        |
| 7                 | 489,529,673        |
| 8                 | 483,657,605        |
| 9                 | 444,160,652        |
| X                 | 368,691,587        |

**TABLE S2:** Paired-end, short-read RNA-Seq data provided to EASEL annotation pipeline.

| <b>Accession</b> | <b>Species</b>                     | <b>Total Reads<br/>(Before QC)</b> | <b>Total Reads<br/>(After QC)</b> | <b>Mapping<br/>Rate</b> | <b>Instrument</b>   | <b>Size (Mb)</b> |
|------------------|------------------------------------|------------------------------------|-----------------------------------|-------------------------|---------------------|------------------|
| DRR055529        | <i>Magivicada<br/>tredecim</i>     | 22,086,780                         | 22,078,654                        | 81.29%                  | Illumina HiSeq 4000 | 868.2            |
| DRR055516        | <i>Magivicada<br/>cassinii</i>     | 21,666,500                         | 21,654,974                        | 87.45%                  | Illumina HiSeq 4000 | 856.9            |
| DRR055519        | <i>Magivicada<br/>neotredecim</i>  | 22,101,494                         | 22,092,126                        | 82.28%                  | Illumina HiSeq 4000 | 869.3            |
| DRR055520        | <i>Magivicada<br/>septendecula</i> | 21,924,338                         | 21,912,260                        | 94.83%                  | Illumina HiSeq 4000 | 2200             |
| DRR055514        | <i>Magivicada<br/>septendecim</i>  | 85,009,400                         | 85,000,848                        | 81.50%                  | Illumina HiSeq 2000 | 5900             |

### **TABLE S3: EnTAP Functional Annotation Statistics**

#### **Total Sequences: 8362163813**

Similarity Search (RefSeq: complete.protein.faa.208.dmnd, NR: nr\_protein.206.dmnd)

Total unique sequences with an alignment: 5726046701

Total unique sequences without an alignment: 2636117112

Gene Families (eggnog4.1)

Total unique sequences with family assignment: 8167358447

Total unique sequences without family assignment: 19485366

Total unique sequences with at least one GO term: 6808547306

Total unique sequences with at least one pathway (KEGG) assignment: 2125913776

Totals

Total unique sequences annotated (similarity search alignments only): 305744

Total unique sequences annotated (gene family assignment only): 2443812490

Total unique sequences annotated (gene family and/or similarity search): 8197859191

Total unique sequences unannotated (gene family and/or similarity search): 16434622

**TABLE S4:** Structural annotation quality assessment of EASEL

|                                 | Unfiltered                 | Filtered                   | Filtered (Longest Isoform) |
|---------------------------------|----------------------------|----------------------------|----------------------------|
| Number of genes                 | 140729                     | 22785                      | 22785                      |
| Number of transcripts           | 303929                     | 83621                      | 22785                      |
| Number of single exon genes     | 94901                      | 3796                       | 3934                       |
| mean exons per transcript       | 3.7                        | 8.6                        | 5.9                        |
| mean gene length                | 59856                      | 173996                     | 131586                     |
| Mono:multi ratio                | 2.07                       | 0.200                      | 0.209                      |
| BUSCO completeness (insecta)    | 99.7%<br>[S:20.8%,D:78.9%] | 96.4%<br>[S:24.9%,D:71.5%] | 91.2%<br>[S:89.2%,D:2.0%]  |
| 70/70 reciprocal BLAST (RefSeq) | -                          | 68.5%                      | 59.4%                      |

**Table S5: Specimen collection details**

Knox Co. TN

35° 57' 22.72" N, 83° 51' 58.08" W 727' elevation

IJAMS Nature Center trails just to the east of the Nature Center, near Tennessee River

23 May 2021, C. Simon, S. Chiswell

1 *M. septendecula* male, 2 *M. septendecula* females

Wilkes Co. NC

36° 11' 8" N, 81° 4' 51" W, 1020 ft. elevation

on River Road just north of the Yadkin River south of NC 268 (Elkin Highway)

24 May 2021, C. Simon, S. Chiswell

3 *M. septendecula* males.

**Table S6**

Link for the full interactive Hi-C contact map:

<https://tinyurl.com/27woqjas>

Figure S1: Blobplot

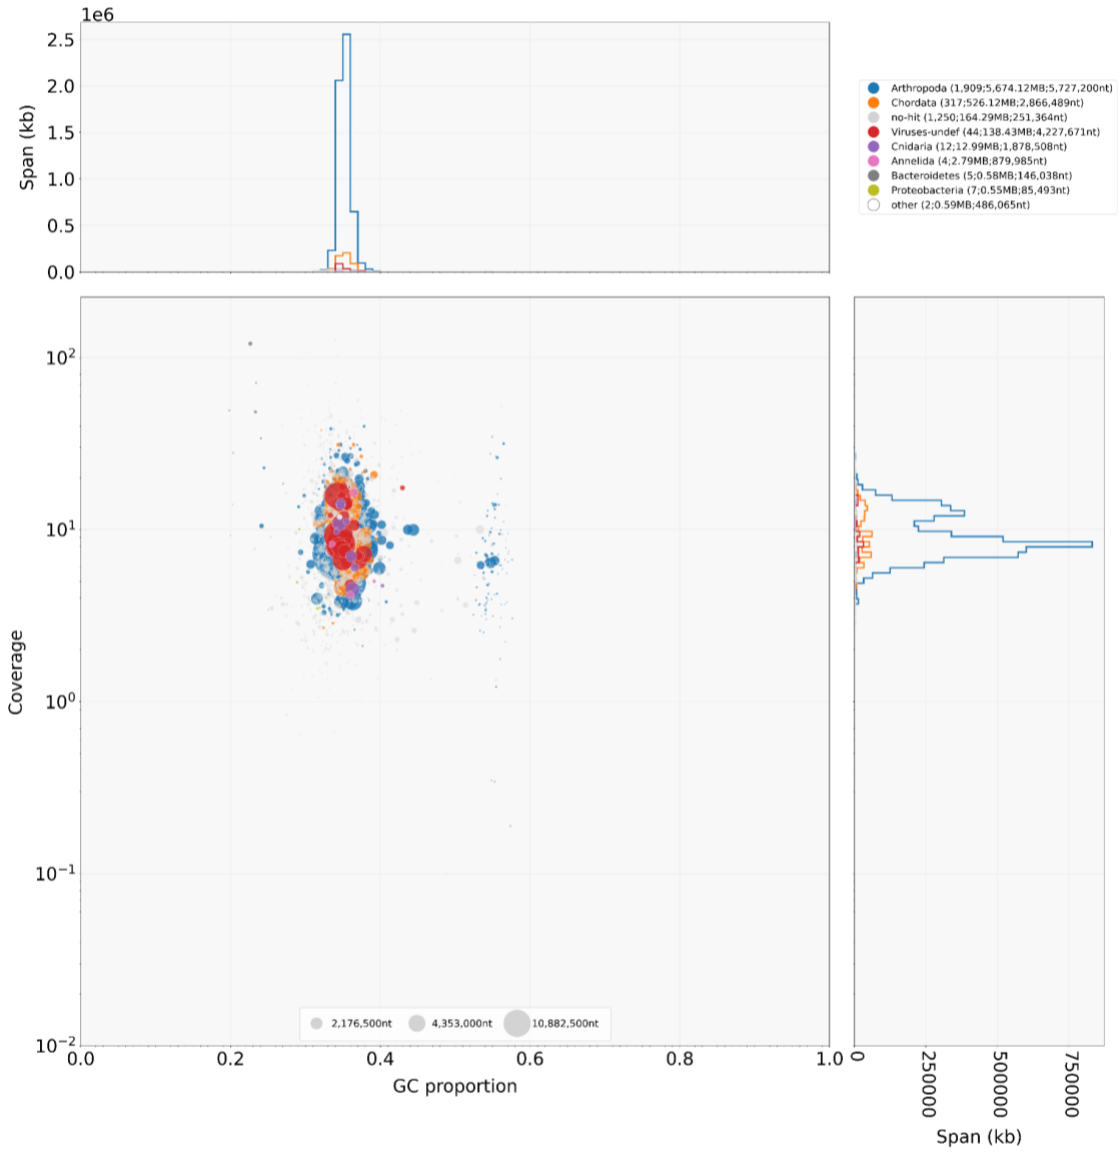

## Figure S2: Telomeric-like regions

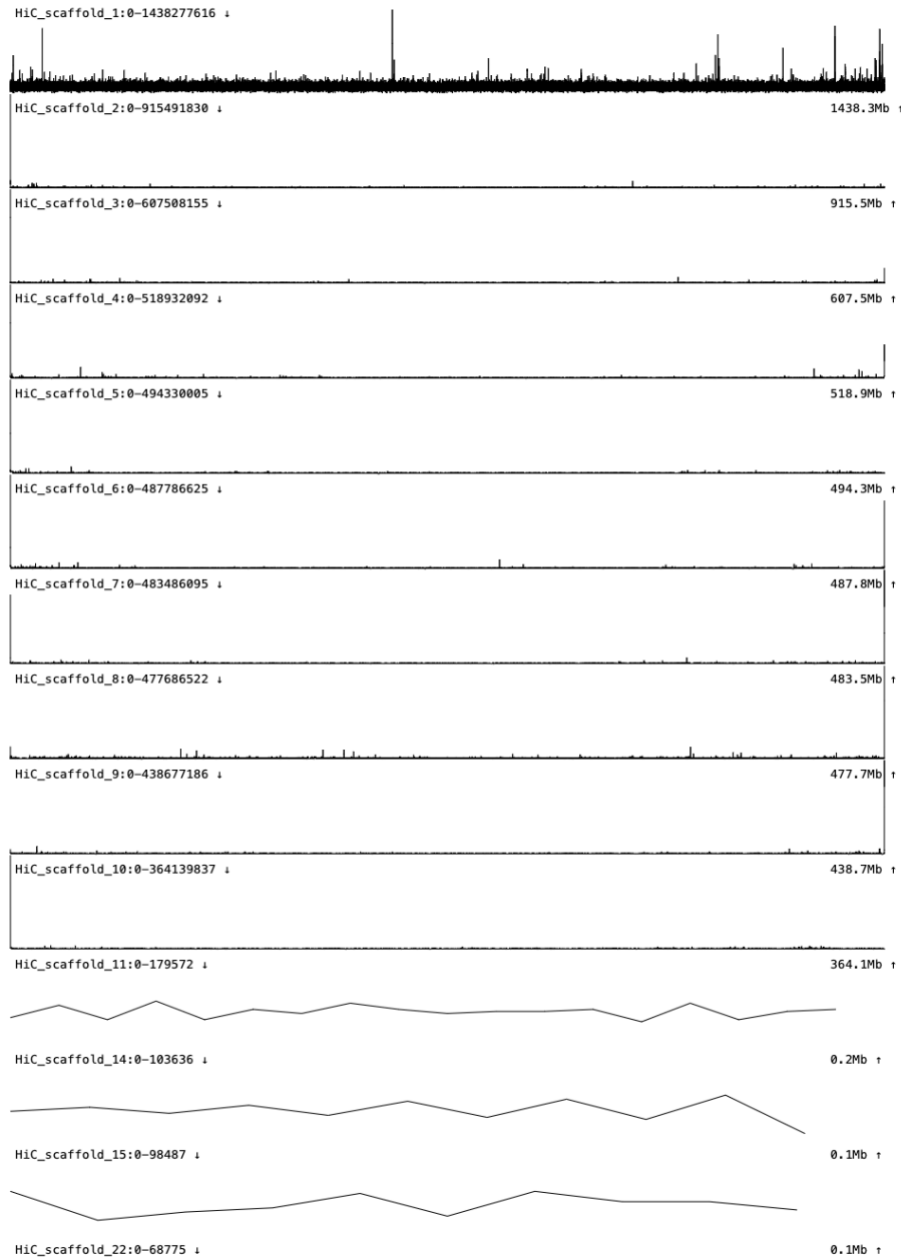

Sharp peaks found on both ends of the first 10 scaffolds represent high likelihood of telomeric regions. In the remaining shorter scaffolds (11, 14, 15, 22), the consistent lines without peaks on the ends indicate no telomeres found. The full plot generated by `tidk` can be found in SVG format in the figshare repository ([10.6084/m9.figshare.24488050](https://figshare.com/10.6084/m9.figshare.24488050)).
